# Supplementary material
Source: Copernicus journal article supplement (doi:10.5194/essd-2026-313)
Supplement: Supplementary file 1 [file essd-2026-313-supplement.pdf]

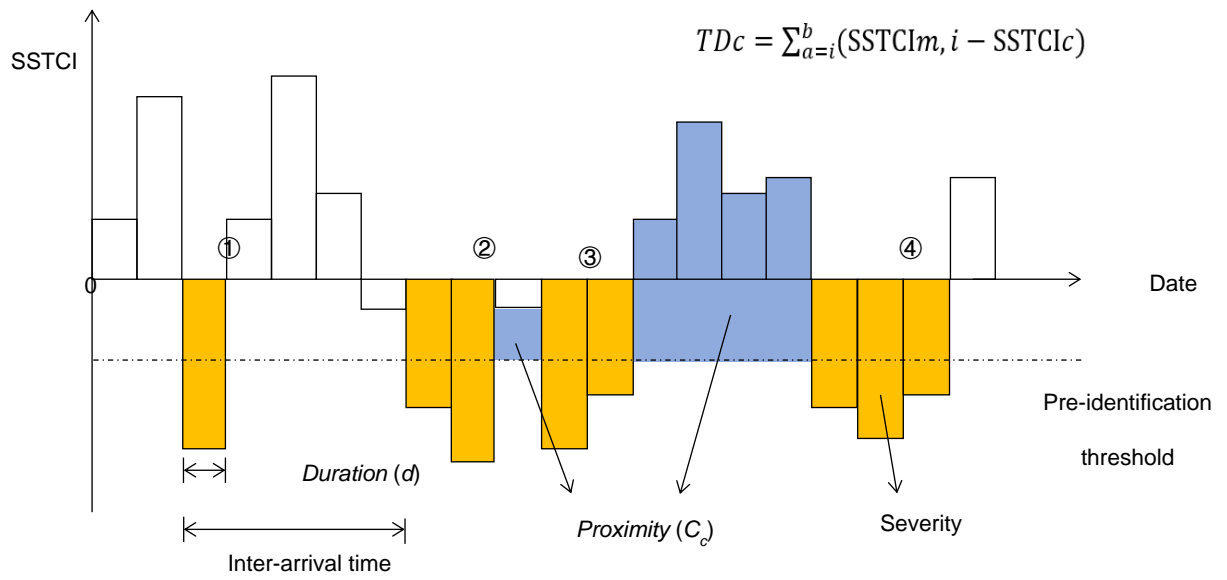

Figure S1: Conceptual illustration of the identification of CDHEs

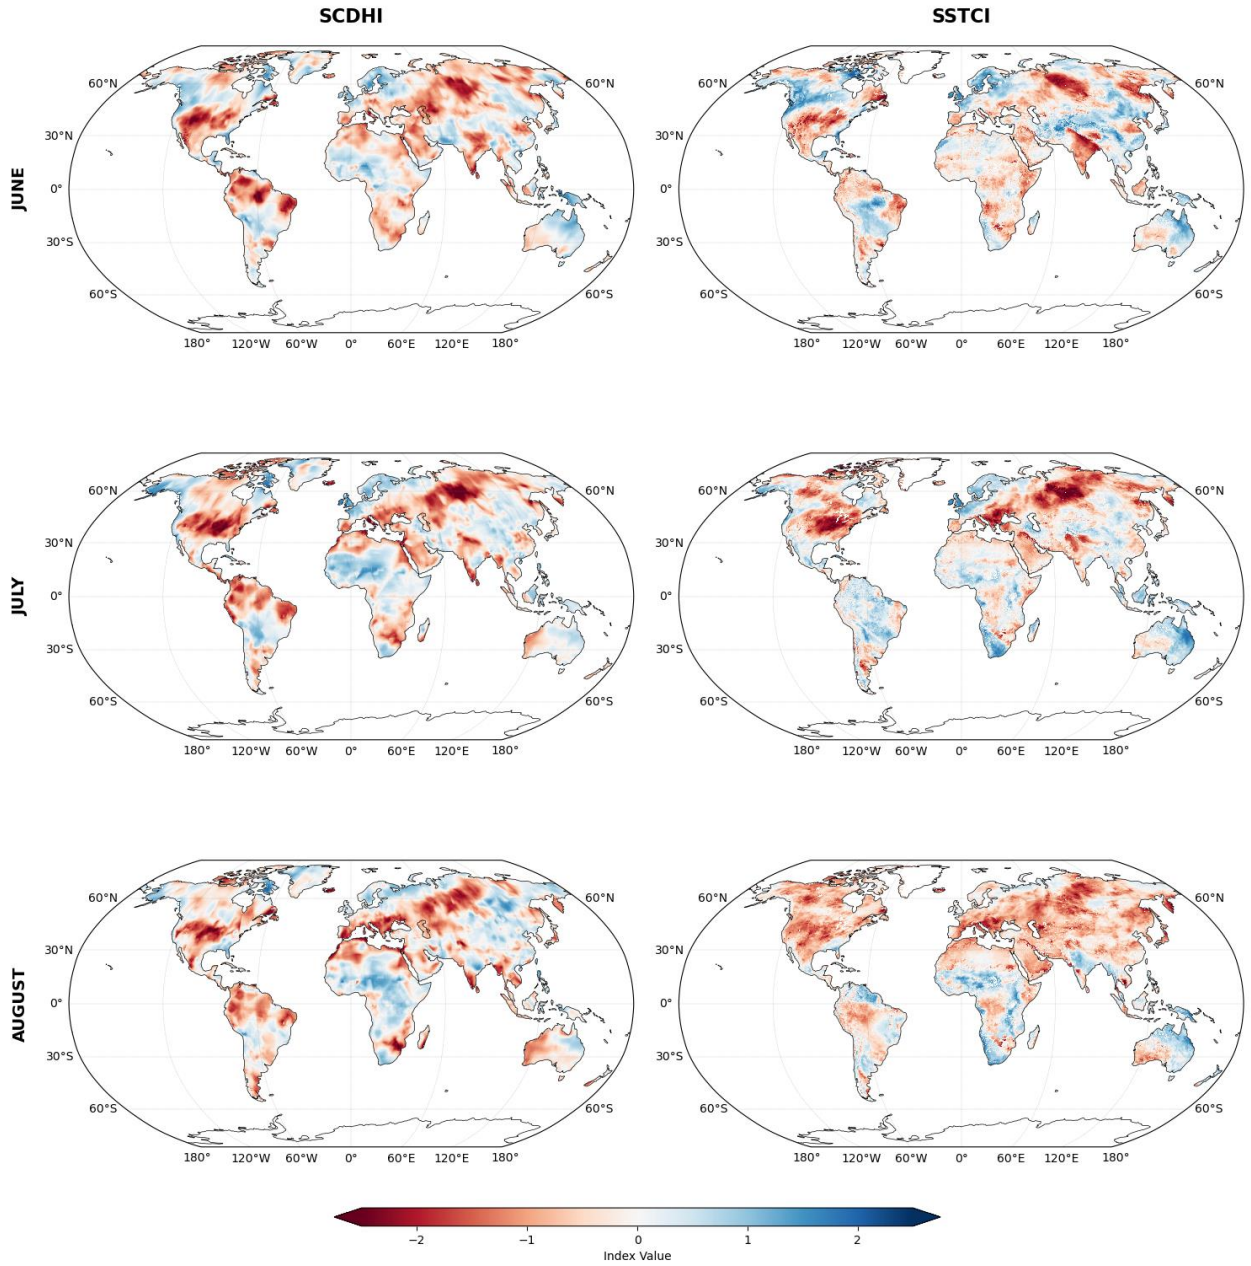

Figure S2: Spatial pattern comparison of standardized compound dry hot index(SCDHI) and standardized soil moisture temperature index (SSTCI) for summer 2012.

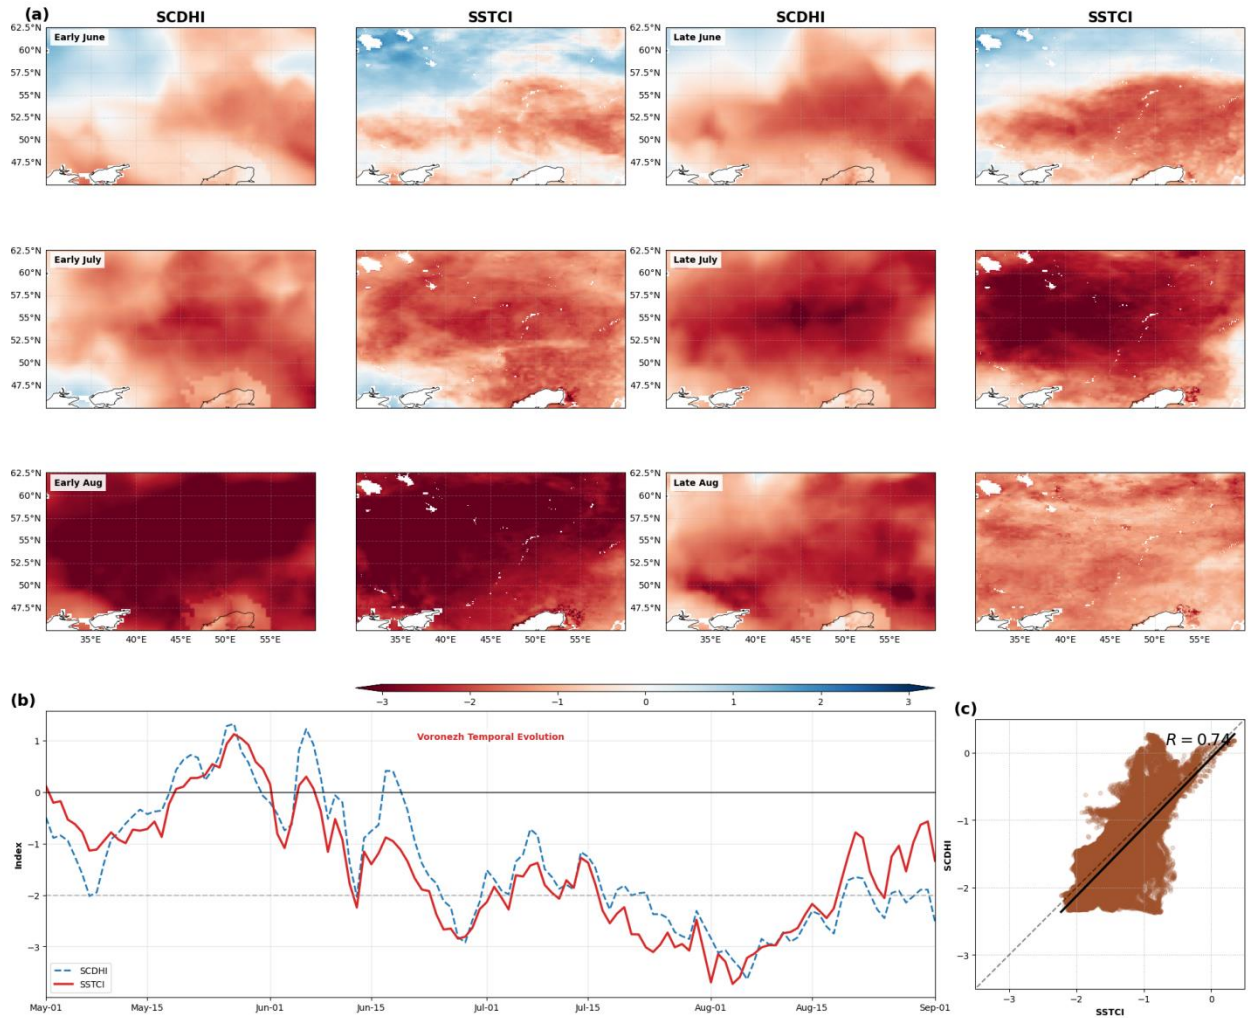

Figure S3: Spatiotemporal analysis of the 2010 Western Russia CDHE event. (a) 15-day mean evolution of SCDHI and SSTCI (June–August) (b) Daily time series for Voronezh (May–September) showing tight coupling between SSTCI and SCDHI (c) JJA spatial correlation across the Western Russia domain (45–65N°,30–60E°). The robust positive relationship ( $R = 0.74$ ) confirms the indices' agreement during extreme conditions.

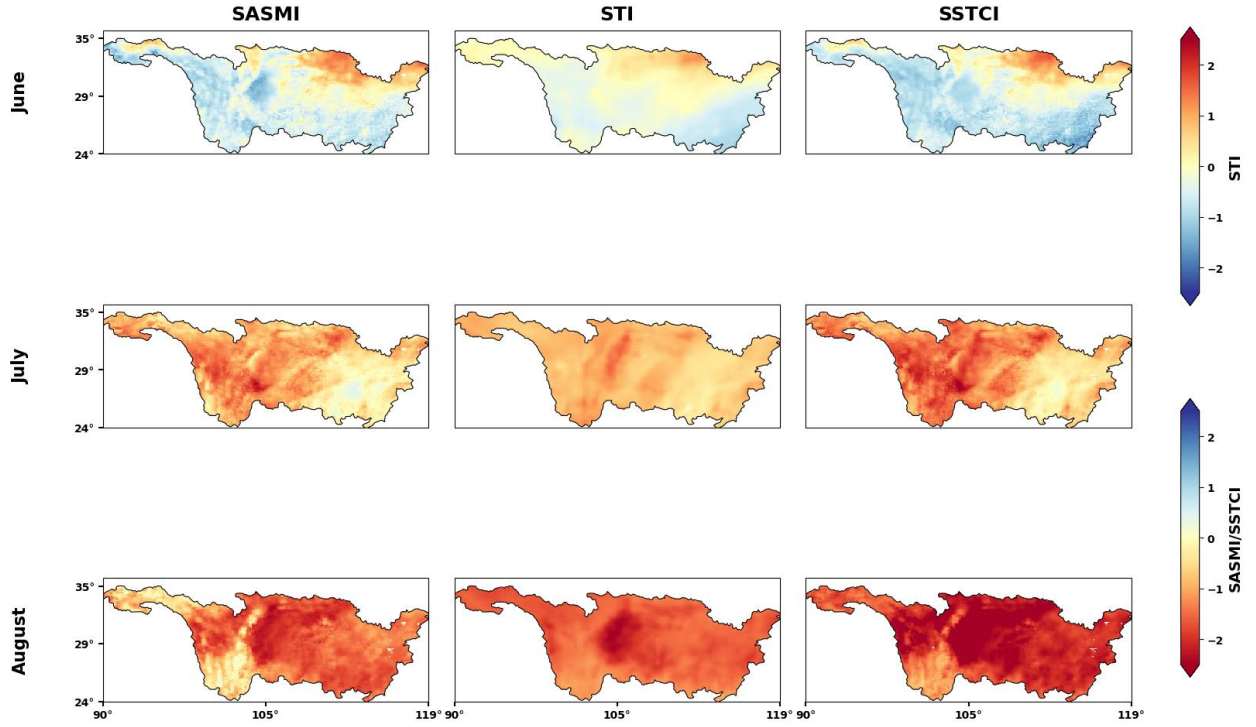

Figure S4: Monthly Evolution of the CDHE 2022 event over the Yangtze River basin

**Table S1:** Categories of compound dry and hot conditions thresholds based on SSTCI

| Category       | SSTCI Threshold |
|----------------|-----------------|
| Abnormal       | -0.80, -0.50    |
| Light          | -1.30, -0.80    |
| Moderate       | -1.60, -1.30    |
| Heavy          | -2.0, -1.60     |
| <b>Extreme</b> | $\leq -2$       |

**Table S2:** Selected latitude and longitude range for the Global Radar plots

| Region                                      | Years     | Lon Min | Lon Max | Lat Min | Lat Max |
|---------------------------------------------|-----------|---------|---------|---------|---------|
| Northern Italy (Po Basin)                   | 2022      | 7.5°E   | 13.2°E  | 44.4°N  | 46.4°N  |
| Southwest US<br>(Mogollon Rim)              | 2021      | 112.3°W | 108.9°W | 33.5°N  | 35.8°N  |
| Pantanal (Brazil)                           | 2020      | 58.5°W  | 55.0°W  | 20.5°S  | 16.5°S  |
| South Africa<br>(central–northern interior) | 2015–2016 | 20.0°E  | 30.5°E  | 28.5°S  | 22.0°S  |
| Northeast Australia                         | 2019      | 142.0°E | 151.0°E | 22.0°S  | 12.0°S  |
| Yangtze River Basin (YRB)                   | 2022      | 103.0°E | 123.0°E | 25.0°N  | 35.0°N  |

**Table S3.** Summary of historical CDHE events identified for an example pixel (**28.9°N, 108.9°E**)

| Number | Duration | Total severity | Intensity | Start Year | Start Month | Start Day | End Year | End Month | End Day |
|--------|----------|----------------|-----------|------------|-------------|-----------|----------|-----------|---------|
| 1      | 17       | 41.87          | 2.46      | 1963       | 2           | 19        | 1963     | 3         | 7       |
| 2      | 6        | 13.91          | 2.32      | 1965       | 5           | 28        | 1965     | 6         | 2       |
| 3      | 3        | 6.43           | 2.14      | 1966       | 1           | 8         | 1966     | 1         | 10      |
| 4      | 3        | 7.85           | 2.62      | 1966       | 1           | 30        | 1966     | 2         | 1       |
| 5      | 4        | 8.32           | 2.08      | 1966       | 10          | 1         | 1966     | 10        | 4       |
| 6      | 5        | 12.39          | 2.48      | 1973       | 2           | 22        | 1973     | 2         | 26      |
| 7      | 16       | 40.21          | 2.51      | 1974       | 1           | 7         | 1974     | 1         | 22      |
| 8      | 4        | 9.59           | 2.40      | 1978       | 3           | 10        | 1978     | 3         | 13      |
| 9      | 3        | 6.38           | 2.13      | 1978       | 7           | 13        | 1978     | 7         | 15      |
| 10     | 3        | 9.01           | 3.00      | 1979       | 1           | 19        | 1979     | 1         | 21      |
| 11     | 3        | 7.14           | 2.38      | 1981       | 5           | 19        | 1981     | 5         | 21      |
| 12     | 3        | 7.67           | 2.56      | 1981       | 7           | 7         | 1981     | 7         | 9       |
| 13     | 3        | 7.35           | 2.45      | 1987       | 1           | 9         | 1987     | 1         | 11      |
| 14     | 11       | 29.01          | 2.64      | 1988       | 11          | 17        | 1988     | 11        | 27      |
| 15     | 3        | 6.89           | 2.30      | 1992       | 1           | 27        | 1992     | 1         | 29      |
| 16     | 12       | 26.19          | 2.18      | 1992       | 8           | 3         | 1992     | 8         | 14      |
| 17     | 3        | 7.89           | 2.63      | 1993       | 1           | 4         | 1993     | 1         | 6       |
| 18     | 3        | 7.68           | 2.56      | 1997       | 2           | 5         | 1997     | 2         | 7       |
| 19     | 4        | 9.00           | 2.25      | 1999       | 2           | 12        | 1999     | 2         | 15      |
| 20     | 4        | 8.48           | 2.12      | 2000       | 4           | 1         | 2000     | 4         | 4       |
| 21     | 3        | 6.36           | 2.12      | 2001       | 5           | 14        | 2001     | 5         | 16      |

|    |    |        |      |      |    |    |      |    |    |
|----|----|--------|------|------|----|----|------|----|----|
| 22 | 9  | 20.76  | 2.31 | 2001 | 5  | 18 | 2001 | 5  | 26 |
| 23 | 3  | 7.69   | 2.56 | 2001 | 12 | 13 | 2001 | 12 | 15 |
| 24 | 4  | 8.62   | 2.16 | 2002 | 6  | 12 | 2002 | 6  | 15 |
| 25 | 3  | 7.53   | 2.51 | 2004 | 12 | 14 | 2004 | 12 | 16 |
| 26 | 4  | 9.06   | 2.26 | 2005 | 7  | 5  | 2005 | 7  | 8  |
| 27 | 3  | 6.61   | 2.20 | 2005 | 8  | 12 | 2005 | 8  | 14 |
| 28 | 3  | 6.65   | 2.22 | 2005 | 9  | 19 | 2005 | 9  | 21 |
| 29 | 6  | 14.63  | 2.44 | 2006 | 8  | 30 | 2006 | 9  | 4  |
| 30 | 4  | 9.57   | 2.39 | 2006 | 9  | 25 | 2006 | 9  | 28 |
| 31 | 3  | 6.54   | 2.18 | 2007 | 10 | 5  | 2007 | 10 | 7  |
| 32 | 3  | 6.91   | 2.30 | 2008 | 9  | 21 | 2008 | 9  | 23 |
| 33 | 3  | 7.14   | 2.38 | 2008 | 12 | 1  | 2008 | 12 | 3  |
| 34 | 17 | 45.81  | 2.69 | 2008 | 12 | 9  | 2008 | 12 | 25 |
| 35 | 3  | 6.69   | 2.23 | 2009 | 8  | 26 | 2009 | 8  | 28 |
| 36 | 4  | 9.10   | 2.28 | 2009 | 9  | 5  | 2009 | 9  | 8  |
| 37 | 3  | 6.60   | 2.20 | 2011 | 8  | 16 | 2011 | 8  | 18 |
| 38 | 3  | 7.05   | 2.35 | 2011 | 8  | 20 | 2011 | 8  | 22 |
| 39 | 10 | 23.18  | 2.32 | 2011 | 8  | 29 | 2011 | 9  | 7  |
| 40 | 4  | 9.42   | 2.35 | 2013 | 3  | 6  | 2013 | 3  | 9  |
| 41 | 22 | 58.22  | 2.65 | 2013 | 7  | 28 | 2013 | 8  | 18 |
| 42 | 5  | 12.76  | 2.55 | 2013 | 10 | 10 | 2013 | 10 | 14 |
| 43 | 5  | 10.93  | 2.19 | 2014 | 1  | 23 | 2014 | 1  | 27 |
| 44 | 6  | 14.35  | 2.39 | 2014 | 1  | 29 | 2014 | 2  | 3  |
| 45 | 5  | 10.90  | 2.18 | 2015 | 1  | 21 | 2015 | 1  | 25 |
| 46 | 8  | 18.41  | 2.30 | 2015 | 10 | 19 | 2015 | 10 | 26 |
| 47 | 3  | 6.53   | 2.18 | 2016 | 9  | 24 | 2016 | 9  | 26 |
| 48 | 3  | 6.27   | 2.09 | 2017 | 11 | 8  | 2017 | 11 | 10 |
| 49 | 9  | 20.67  | 2.30 | 2019 | 8  | 20 | 2019 | 8  | 28 |
| 50 | 7  | 17.86  | 2.55 | 2019 | 9  | 29 | 2019 | 10 | 5  |
| 51 | 3  | 6.85   | 2.28 | 2019 | 10 | 9  | 2019 | 10 | 11 |
| 52 | 5  | 13.13  | 2.63 | 2021 | 10 | 1  | 2021 | 10 | 5  |
| 53 | 6  | 15.98  | 2.66 | 2022 | 7  | 12 | 2022 | 7  | 17 |
| 54 | 41 | 112.71 | 2.75 | 2022 | 8  | 11 | 2022 | 9  | 20 |
| 55 | 6  | 15.37  | 2.56 | 2022 | 9  | 29 | 2022 | 10 | 4  |
| 56 | 15 | 35.58  | 2.37 | 2022 | 10 | 14 | 2022 | 10 | 28 |
| 57 | 5  | 10.98  | 2.20 | 2022 | 10 | 30 | 2022 | 11 | 3  |
| 58 | 4  | 10.63  | 2.66 | 2022 | 11 | 9  | 2022 | 11 | 12 |
| 59 | 3  | 6.45   | 2.15 | 2023 | 9  | 9  | 2023 | 9  | 11 |
| 60 | 4  | 9.05   | 2.26 | 2023 | 12 | 6  | 2023 | 12 | 9  |
